# Supplementary material for: Analysis of Policies to Protect the Health of Urban Refugees and Asylum Seekers in Thailand: A Qualitative Study and Delphi Survey
Source: MDPI journal article supplement (doi:10.3390/ijerph182010566), 2021-10-09
Supplement: s1 [file s1]

### Supplementary file 1: questionnaires for Delphi survey

| Domain           | Question detail                                                                                                                                                                                                   | Opinion<br>(1 least agree ←→5 most agree) |   |   |   |   | Additional comments |
|------------------|-------------------------------------------------------------------------------------------------------------------------------------------------------------------------------------------------------------------|-------------------------------------------|---|---|---|---|---------------------|
|                  |                                                                                                                                                                                                                   | 1                                         | 2 | 3 | 4 | 5 |                     |
| Health financing | 1. Urban refugees should have rights to receive health services provided by the public facilities and the Ministry of Public Health should be the main authority responsible for any expenses incurred.           |                                           |   |   |   |   |                     |
|                  | 2. Urban refugees should have rights to receive health services provided by the public facilities and the National Health Security Office should be the main authority responsible for any expenses incurred.     |                                           |   |   |   |   |                     |
|                  | 3. Urban refugees should have rights to receive health services provided by the public facilities; however, any expenses incurred should be mainly borne by the clients themselves.                               |                                           |   |   |   |   |                     |
|                  | 4. Urban refugees should have rights to receive health services provided by the public facilities. Any expenses incurred should be borne by the UNHCR.                                                            |                                           |   |   |   |   |                     |
|                  | 5. Urban refugees should have rights to receive health services provided by the public facilities. Any expenses incurred should be borne by the NGOs.                                                             |                                           |   |   |   |   |                     |
| Benefit package  | 6. The benefit package for urban refugees should cover only care for basic diseases, for instance, general outpatient care and essential vaccination                                                              |                                           |   |   |   |   |                     |
|                  | 7. The benefit package for urban refugees should cover only treatment for emergency conditions and accidents.                                                                                                     |                                           |   |   |   |   |                     |
|                  | 8. The benefit package for urban refugees should cover only treatment for communicable diseases with public health threat, such as measles, tuberculosis, and influenza.                                          |                                           |   |   |   |   |                     |
|                  | 9. The benefit package for urban refugees should be comprehensive and covering all types of care (from general outpatient and inpatient treatments to high-cost care), similar to the benefits for Thai citizens. |                                           |   |   |   |   |                     |
|                  | 10. The benefit package for urban refugees should be cover as same as benefit package for migrant workers.                                                                                                        |                                           |   |   |   |   |                     |
|                  | 11. The benefit package for urban refugees should be cover treatment for mental diseases or other mental problems, such as stress and mental disorder.                                                            |                                           |   |   |   |   |                     |
| Insurance        | 12. Urban refugees should have rights to purchase the insurance for migrant workers of the Ministry of Public Health.                                                                                             |                                           |   |   |   |   |                     |

| Domain                      | Question detail                                                                                                                                | Opinion<br>(1 least agree ←→5 most agree) |   |   |   |   | Additional comments |
|-----------------------------|------------------------------------------------------------------------------------------------------------------------------------------------|-------------------------------------------|---|---|---|---|---------------------|
|                             |                                                                                                                                                | 1                                         | 2 | 3 | 4 | 5 |                     |
|                             | 13. Urban refugees should have rights to be enrolled in the Social Security Scheme which is managed by the Ministry of Labour.                 |                                           |   |   |   |   |                     |
|                             | 14. Urban refugees should have rights to be enrolled in the Universal Coverage Scheme which is managed by the National Health Security Office. |                                           |   |   |   |   |                     |
|                             | 15. Urban refugees should have rights to buy health insurance from private organisations                                                       |                                           |   |   |   |   |                     |
|                             |                                                                                                                                                |                                           |   |   |   |   |                     |
| Other aspects of well-being | 16. Children of urban refugees should have rights to enjoy basic education at the same level as Thai children                                  |                                           |   |   |   |   |                     |
|                             | 17. Urban refugees should have rights to get work permit and be able to work in Thailand children.                                             |                                           |   |   |   |   |                     |
|                             | 18. Urban refugees should have their name and family profile recorded in the civil registry similarly to Thai citizens.                        |                                           |   |   |   |   |                     |
|                             | 19. Urban refugees should have rights to live outside detention center or refugee center.                                                      |                                           |   |   |   |   |                     |
| position of Thai government | 20. Thailand should ratify the United Nations 1951 UNHCR Refugee Convention.                                                                   |                                           |   |   |   |   |                     |
|                             | 21. The current position of Thai government on urban refugees is appropriate.                                                                  |                                           |   |   |   |   |                     |
