# Supplementary figures and images for: Analysis of Policies to Protect the Health of Urban Refugees and Asylum Seekers in Thailand: A Qualitative Study and Delphi Survey
Source: MDPI journal article supplement (doi:10.3390/ijerph182010566), 2021-10-09

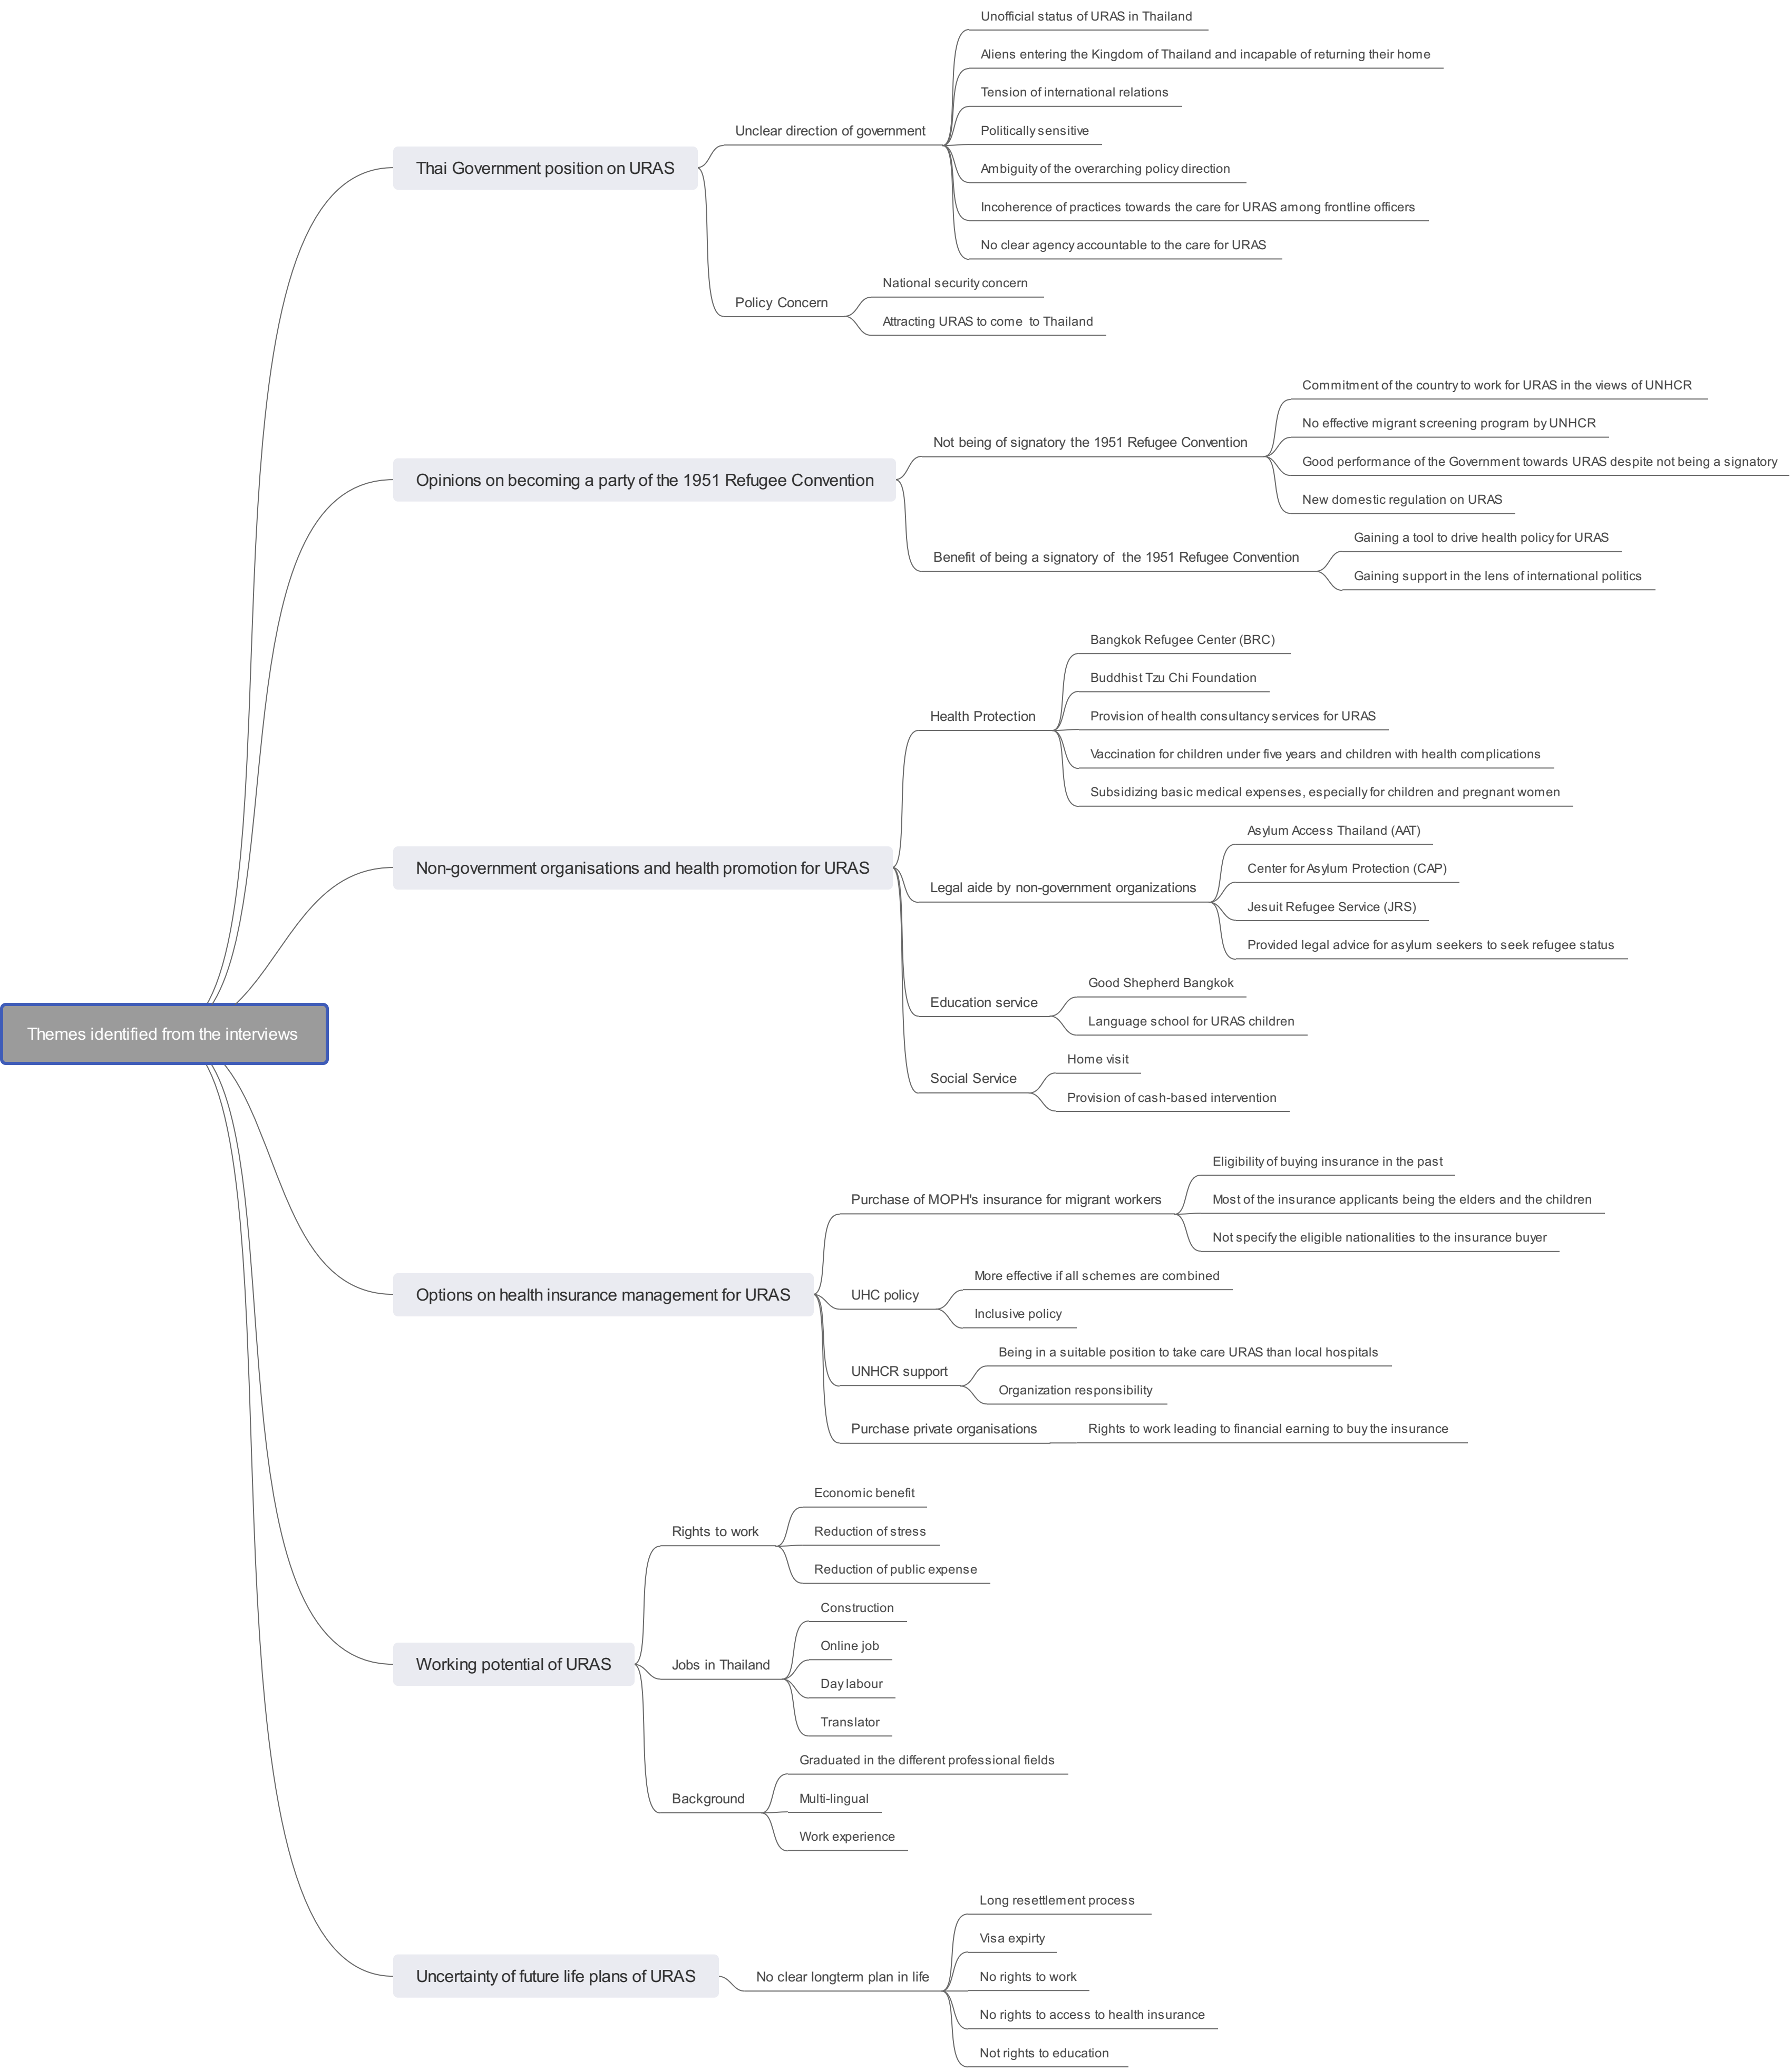

Supplement: s1 [file s1]
